# Supplementary material for: Towards a hydrogeomorphological understanding of proglacial catchments: an assessment of groundwater storage and release in an Alpine catchment
Source: Copernicus journal article supplement (doi:10.5194/hess-26-6029-2022), 2022-12-02
Supplement: Supplementary file 1 [file hess-26-6029-2022-supplement.zip]

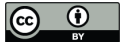

## *Supplement of*

# **Towards a hydrogeomorphological understanding of proglacial catchments: an assessment of groundwater storage and release in an Alpine catchment**

**Tom Müller et al.**

*Correspondence to:* Tom Müller (tom.muller.1@unil.ch)

- hess-26-6029-2022-supplement-title-page.pdf
- codes
  - model\_massBalance
    - \* 2021\_SnowMeltModel\_PUBLISH.ipynb
    - \* SnowMelt.csv
    - \* data
    - \* figure
  - model\_storageRelease
    - \* 2021\_Combined\_simpleStorage\_REV1.ipynb
    - \* Discharge2020\_10T.csv
    - \* Discharge2021\_10T.csv
    - \* SnowMelt.csv
    - \* WeatherData.zip
    - \* figures
    - \* shares
  - recession\_analysis
    - \* CODE\_recession\_analysis.m
    - \* dischargeData2006-17.mat
    - \* dqdt.pdf
    - \* export
    - \* recession\_Otemma\_KirchnerOnly2021\_PUBLISH.m
    - \* recession\_parameters.pdf
    - \* recession\_years.pdf

The copyright of individual parts of the supplement might differ from the article licence.
