# Supplementary figures and images for: Towards a hydrogeomorphological understanding of proglacial catchments: an assessment of groundwater storage and release in an Alpine catchment
Source: Copernicus journal article supplement (doi:10.5194/hess-26-6029-2022), 2022-12-02

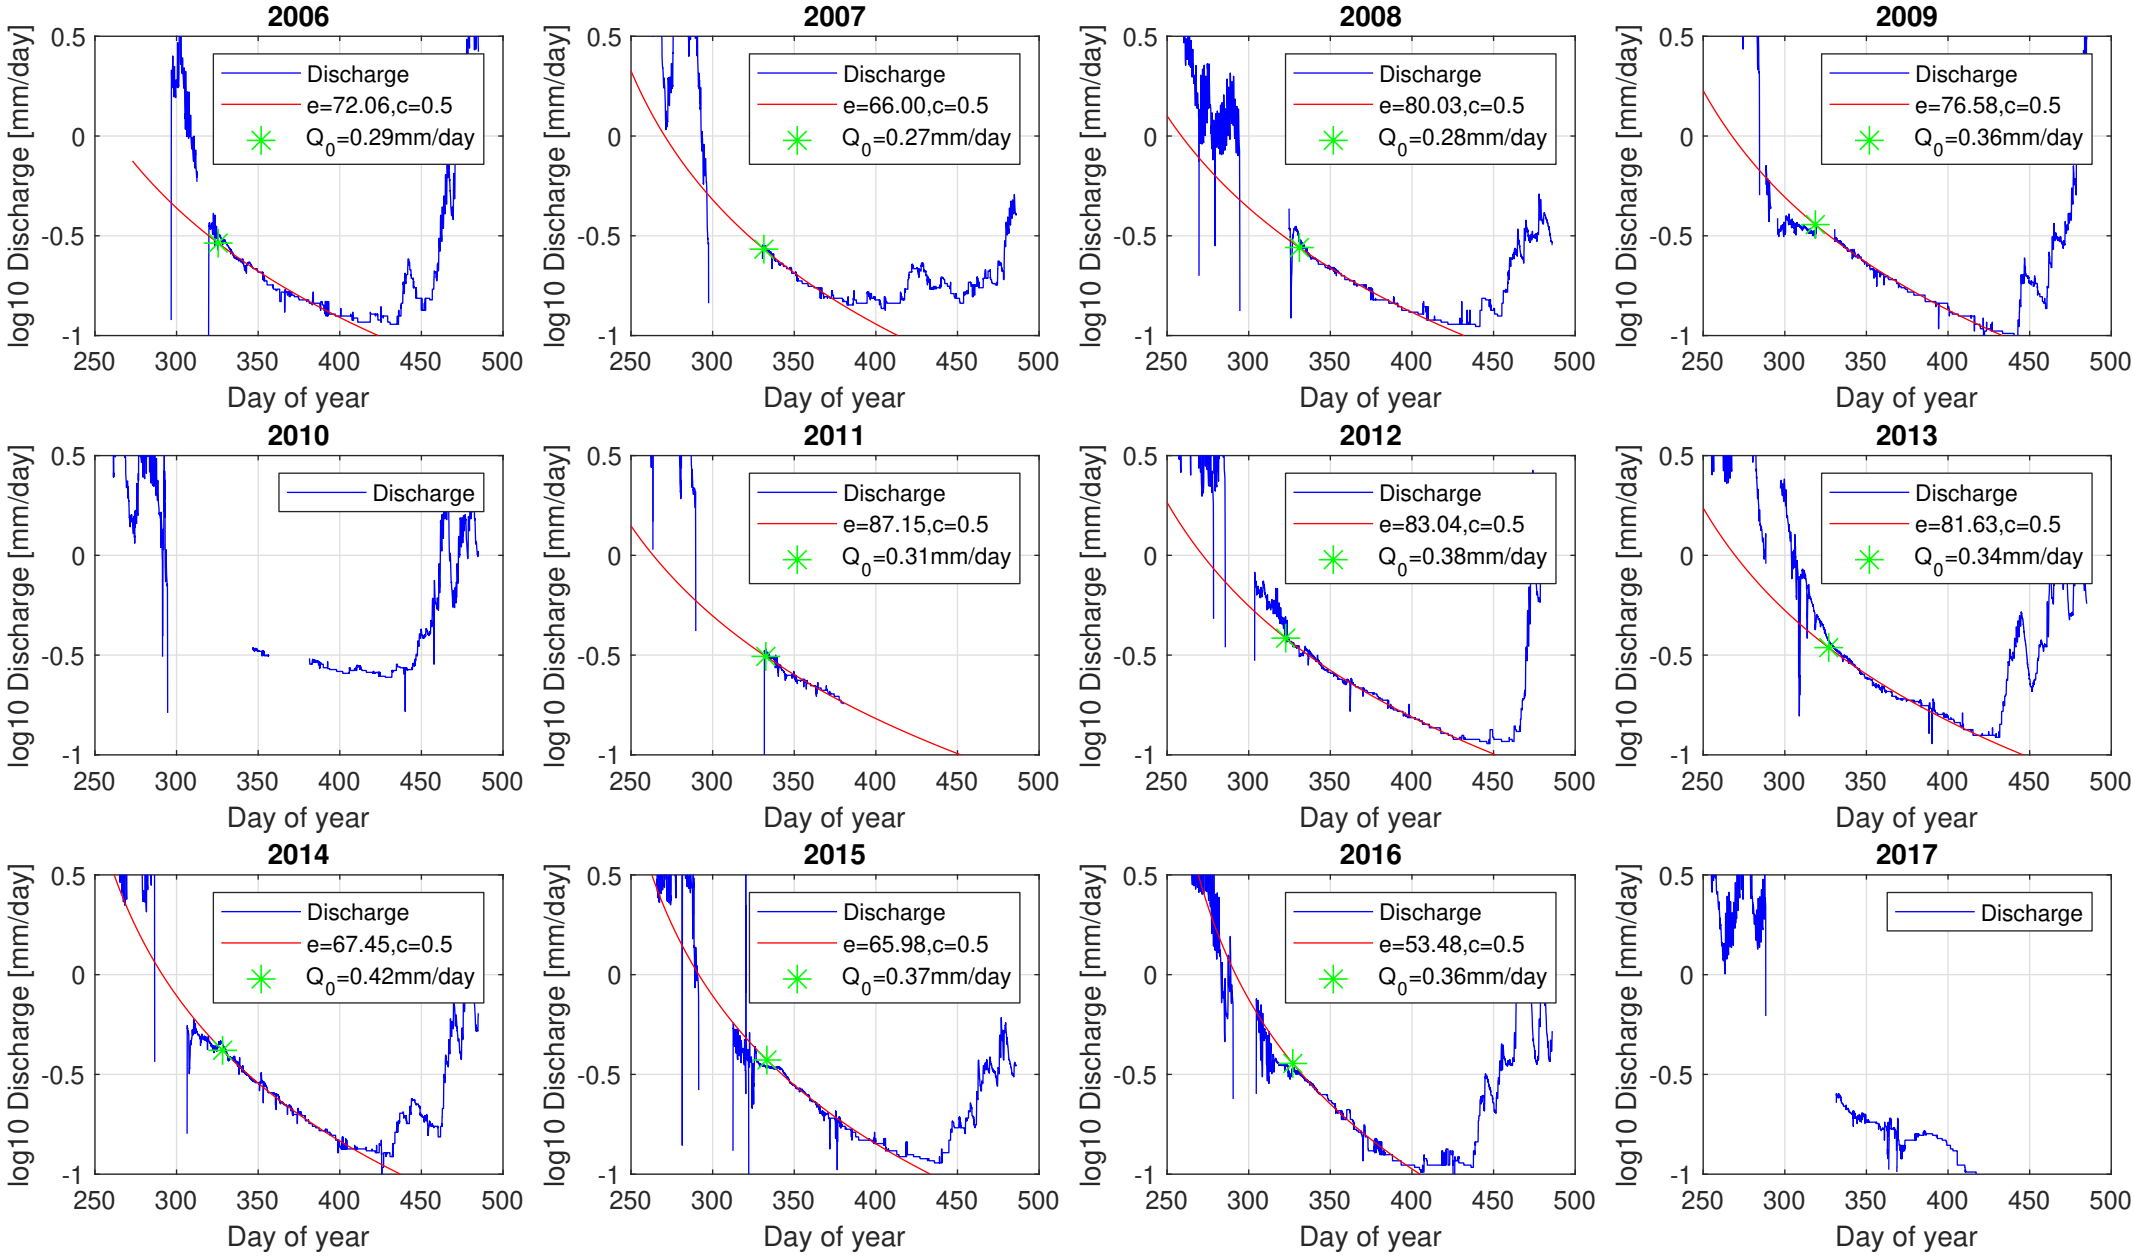

Supplement: Supplementary file 2 [file hess-26-6029-2022-supplement.zip]

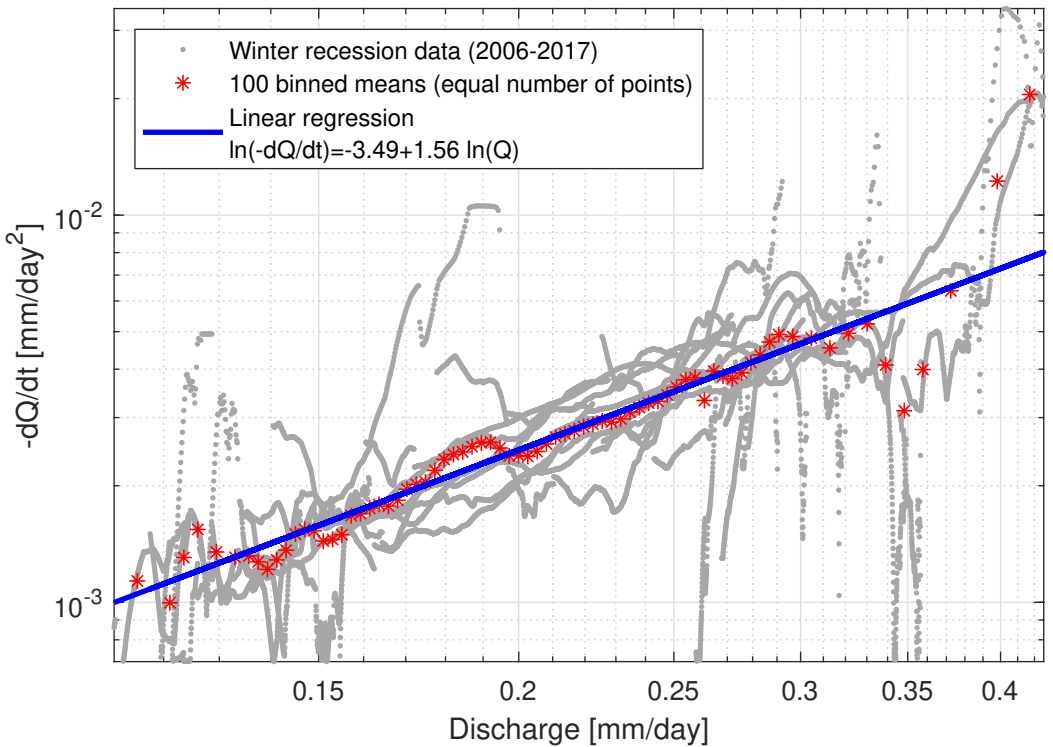

Supplement: Supplementary file 3 [file hess-26-6029-2022-supplement.zip]

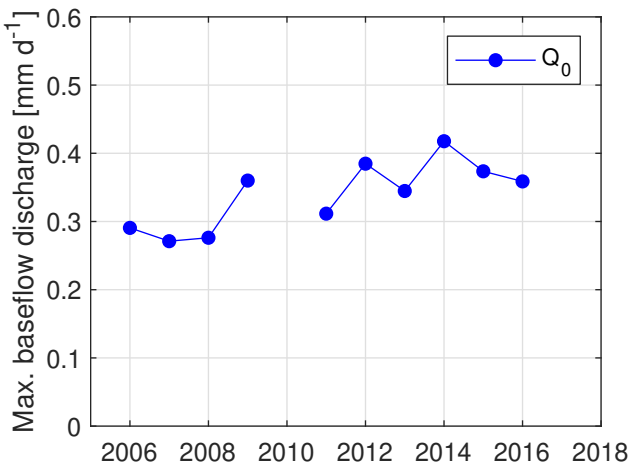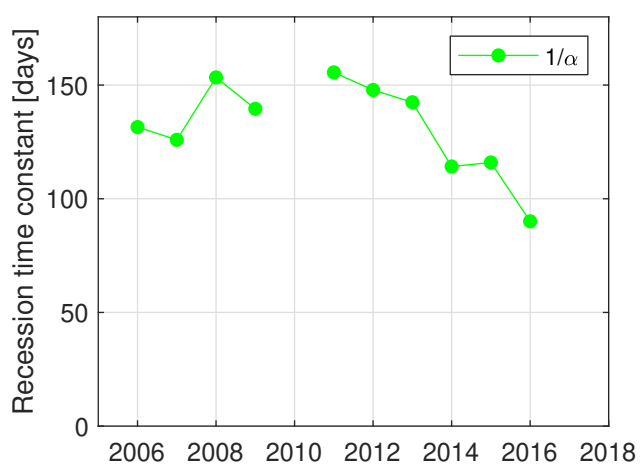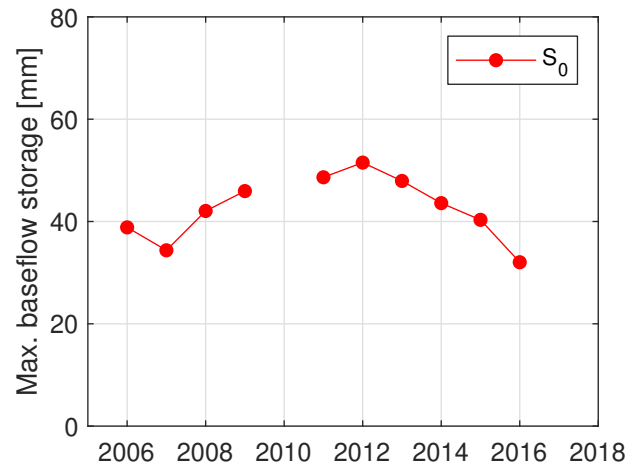

Supplement: Supplementary file 4 [file hess-26-6029-2022-supplement.zip]
